# Supplementary material
Source: PubMed Central journal article supplement (PMC4699399)
Supplement: NIHMS744459-supplement-supplement_1.pdf [file NIHMS744459-supplement-supplement_1.pdf]

**eTable 1. Outcomes of VLBW Infants According to Postnatal CMV Infection in Sensitivity Analyses**

|                                                                       | Postnatal<br>CMV | No Postnatal<br>CMV | Adjusted RR<br>(95% CI) | P      |
|-----------------------------------------------------------------------|------------------|---------------------|-------------------------|--------|
| <b>Exclude postnatal CMV infection based on diagnosis only</b>        |                  |                     |                         |        |
| n <sup>a</sup>                                                        | 206              | 206                 |                         |        |
| Death or BPD at 36 weeks postmenstrual age                            | 76%              | 62%                 | 1.24 (1.10, 1.39)       | <0.001 |
| BPD                                                                   | 72%              | 54%                 | 1.31 (1.14, 1.52)       | <0.001 |
| Death prior to hospital discharge                                     | 9%               | 9%                  | 0.95 (0.51, 1.77)       | 0.87   |
| <b>Exclude children with diagnosis of congenital CMV</b>              |                  |                     |                         |        |
| n <sup>b</sup>                                                        | 181              | 181                 |                         |        |
| Death or BPD at 36 weeks postmenstrual age                            | 77%              | 59%                 | 1.30 (1.14, 1.48)       | <0.001 |
| BPD                                                                   | 72%              | 54%                 | 1.34 (1.15, 1.56)       | <0.001 |
| Death prior to hospital discharge                                     | 9%               | 7%                  | 1.33 (0.67, 2.67)       | 0.42   |
| <b>Exclude postnatal CMV infection at ≥34 weeks postmenstrual age</b> |                  |                     |                         |        |
| n <sup>c</sup>                                                        | 215              | 215                 |                         |        |
| Death or BPD at 36 weeks postmenstrual age                            | 80%              | 69%                 | 1.16 (1.05, 1.28)       | 0.01   |
| BPD                                                                   | 74%              | 57%                 | 1.29 (1.13, 1.48)       | <0.001 |
| Death prior to hospital discharge                                     | 9%               | 13%                 | 0.66 (0.39, 1.11)       | 0.12   |

Abbreviations: VLBW, very low birth weight; CMV, cytomegalovirus; RR, risk ratio; CI, confidence interval; BPD, bronchopulmonary dysplasia.

<sup>a</sup>16 infants with postnatal CMV had missing data for one or more variables used to generate propensity score.

<sup>b</sup>12 infants with postnatal CMV had missing data for one or more variables used to generate propensity score.

<sup>c</sup>18 infants with postnatal CMV had missing data for one or more variables used to generate propensity score and 1 infant had a propensity score for which a matched comparison infant was not identified.
